# Supplementary material for: Excellent catalytic effects of highly crumpled graphenenanosheets on hydrogenation/dehydrogenation of magnesium hydride
Source: Royal Society of Chemistry journal article supplement (doi:10.1039/c2nr33347c), 2012-12-03
Supplement: c2nr33347c.pdf [file c2nr33347c.pdf]

# Excellent Catalytic Effects of Highly Crumpled Graphene Nanosheets on Hydrogenation/dehydrogenation of Magnesium Hydride

Guang Liu, Yijing Wang\*, Changchang Xu, Fangyuan Qiu, Cuihua An, Li Li, Lifang  
Jiao, Huatang Yuan

Institute of New Energy Material Chemistry, Key Laboratory of Advanced Energy  
Materials Chemistry (MOE), Tianjin Key Lab on Metal and Molecule-based Material  
Chemistry, Nankai University, Tianjin 300071, P. R. China

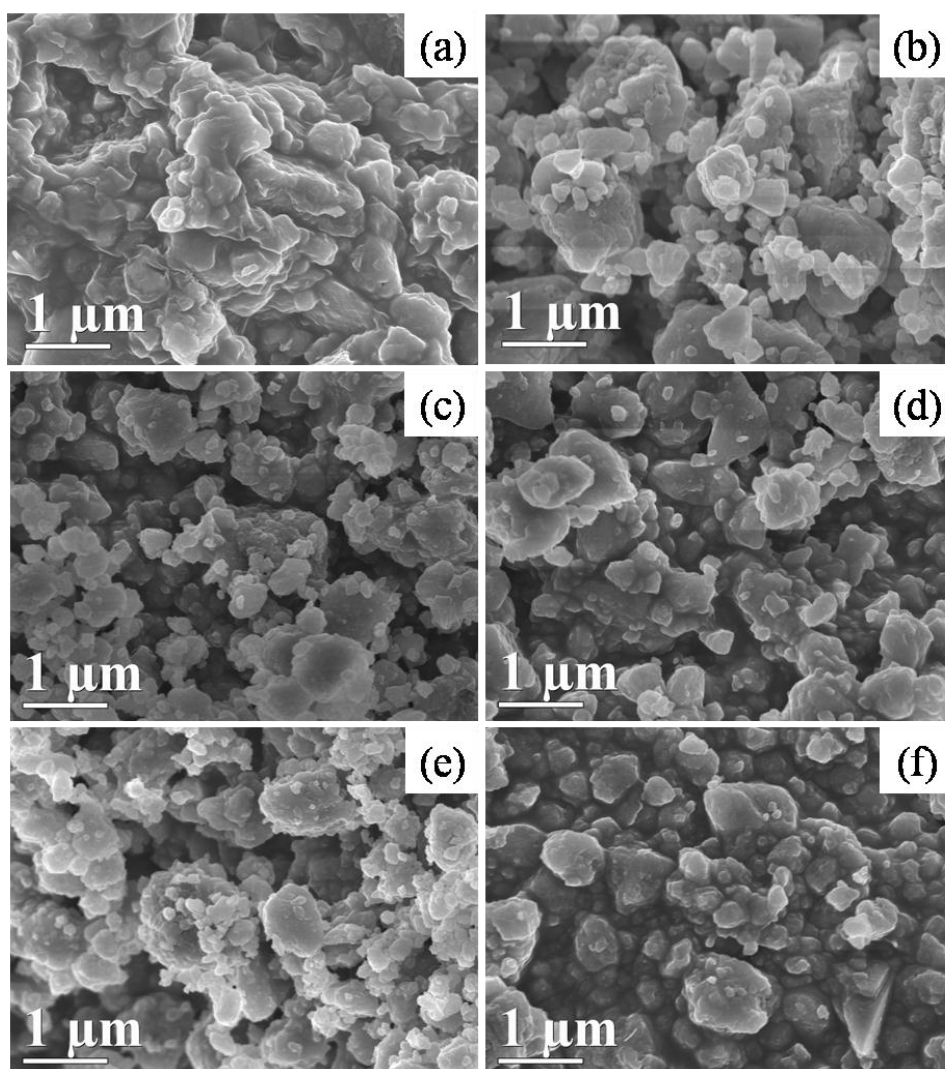

Fig. S1 SEM images of (a) MgH<sub>2</sub>-5GNS-1h, (b) MgH<sub>2</sub>-5GNS-5h, (c) MgH<sub>2</sub>-5GNS-10h, (d) MgH<sub>2</sub>-5GNS-15h, (e) MgH<sub>2</sub>-5GNS-20h, and (f) MgH<sub>2</sub>-20h, respectively.

**Table S1 Kinetic data obtained from the absorption experiments of different samples at different temperature.**

| sample                              | Temperature<br>(°C) | slope (n) | -lnk  | Ea<br>(kJ mol <sup>-1</sup> ) |
|-------------------------------------|---------------------|-----------|-------|-------------------------------|
| MgH <sub>2</sub> -5wt%<br>-5GNS-1h  | 300                 | 0.66      | 4.35  | 123.3                         |
|                                     | 200                 | 0.96      | 9.52  |                               |
|                                     | 150                 | 1.01      | 13.6  |                               |
| MgH <sub>2</sub> -5wt%<br>-5GNS-5h  | 300                 | 0.52      | 4.09  | 102.2                         |
|                                     | 200                 | 0.81      | 8.60  |                               |
|                                     | 150                 | 0.84      | 11.7  |                               |
| MgH <sub>2</sub> -5wt%<br>-5GNS-10h | 300                 | 1.04      | 3.36  | 94.8                          |
|                                     | 200                 | 0.97      | 7.70  |                               |
|                                     | 150                 | 0.93      | 10.4  |                               |
| MgH <sub>2</sub> -5wt%<br>-5GNS-15h | 300                 | 1.10      | 3.0   | 86.8                          |
|                                     | 200                 | 0.97      | 6.82  |                               |
|                                     | 150                 | 0.91      | 9.46  |                               |
| MgH <sub>2</sub> -5wt%<br>-5GNS-20h | 300                 | 1.16      | 2.94  | 76.2                          |
|                                     | 200                 | 1.10      | 6.42  |                               |
|                                     | 150                 | 1.01      | 8.59  |                               |
| MgH <sub>2</sub> -20h               | 300                 | 0.95      | 3.54  | 99.0                          |
|                                     | 200                 | 0.96      | 7.76  |                               |
|                                     | 150                 | 1.02      | 10.93 |                               |

### Notes on calculation of reaction rate $k$ and activation energy $E_a$ :

The obtained absorption data can be well fitted by Johnson-Mehl-Avrami equation as follows<sup>1, 2</sup>:

$$kt = [-\ln(1 - \alpha)]^{1/n}$$

Where  $\alpha$  is the fraction of metal already becomes hydride at time  $t$ ,  $n$  is the dimensionality of  $MgH_2$  growth. Plotting the data as:

$$\ln(-\ln(1 - \alpha)) \text{ Versus } \ln(t)$$

Yields a straight line where  $n = \text{slope}$  and  $k = e^{(y\text{-intercept})/\text{slope}}$ .

The rate constant  $k$  is a function of temperature  $T$  and pressure  $P$ . Hence, it can be written in the following form<sup>3</sup>:

$$k = k(P) \cdot k(T) = k(P) \cdot K_0 \exp\left(-\frac{E_a}{RT}\right)$$

For determining the activation energy through the Arrhenius equation, the values of  $k$  were corrected for the difference in driving forces during the measurements. Separate hydrogen absorption kinetics experiments of the  $MgH_2$ -5wt%GNS show that the rate constant  $k(P, T_0)$  follows the parabolic relationship.

$$k(P) = 1 - \sqrt{P/P_{eq}}$$

$P$  is the  $H_2$  pressure during the reaction and  $P_{eq}$  is the equilibrium  $H_2$  pressure.

### References:

1. J. F. Fernández and C. R. Sánchez, *J. Alloys. Compd.*, 2002, **340**, 189-198.
2. P. Rudman, *J. Appl. Phys.*, 1979, **50**, 7195-7199.
3. B. Zahiri, M. Danaie, X. Tan, B. S. Amirkhiz, G. A. Botton and D. Mitlin, *J. Phys. Chem. C*, 2011, **116**, 3188-3199.
